# Supplementary material for: Crystallization Behavior and Physical Properties of Monoglycerides-Based Oleogels as Function of Oleogelator Concentration
Source: MDPI journal article supplement (doi:10.3390/foods12020345), 2023-01-11
Supplement: s1 [file s1]

Supplementary materials

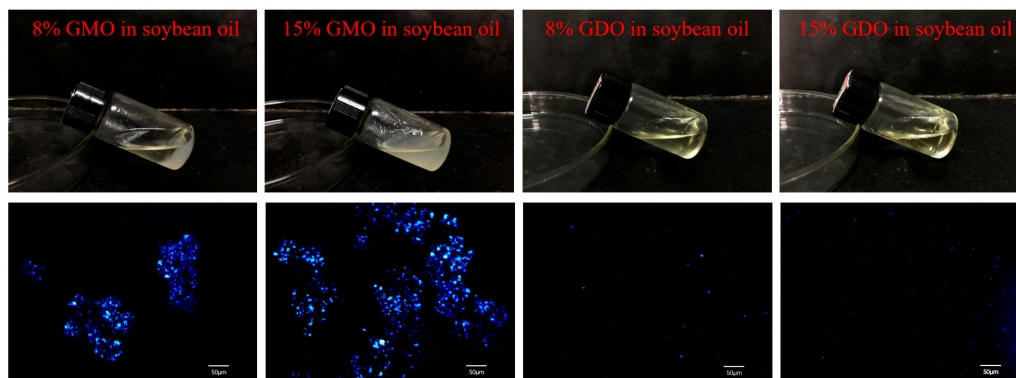

**Figure S1.** Visual appearance and polarized light microscopy images of oleogels prepared by monoolein (GMO) and diolein (GDO). The scale bar is 50  $\mu\text{m}$ .

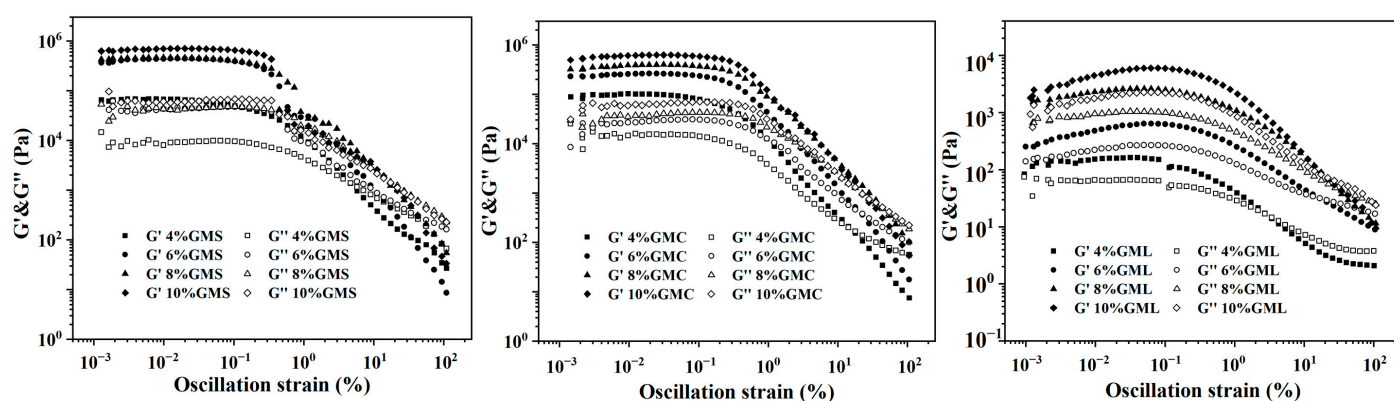

**Figure S2.** Strain sweep curves of oleogels prepared by GMS, GMC and GML with different concentrations.

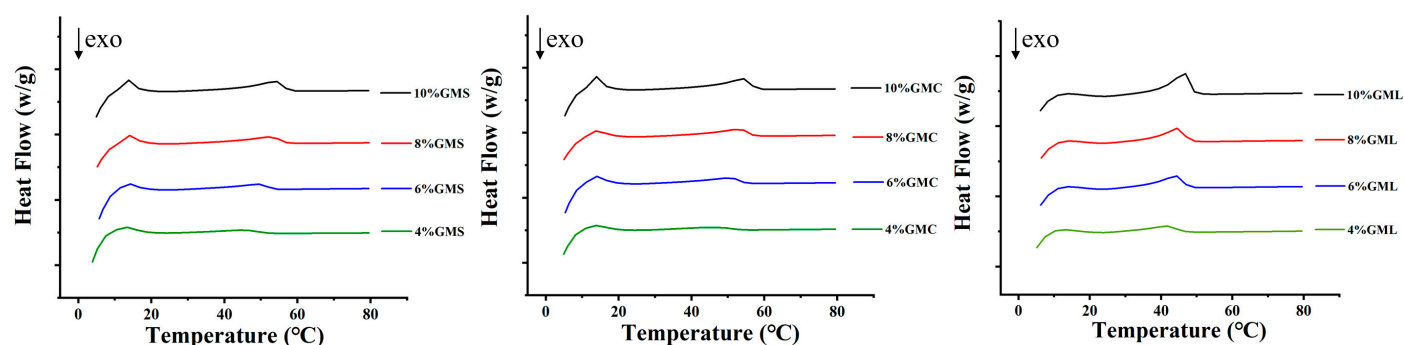

**Figure S3.** DSC patterns of oleogels prepared by GMS, GMC and GML with different concentrations.

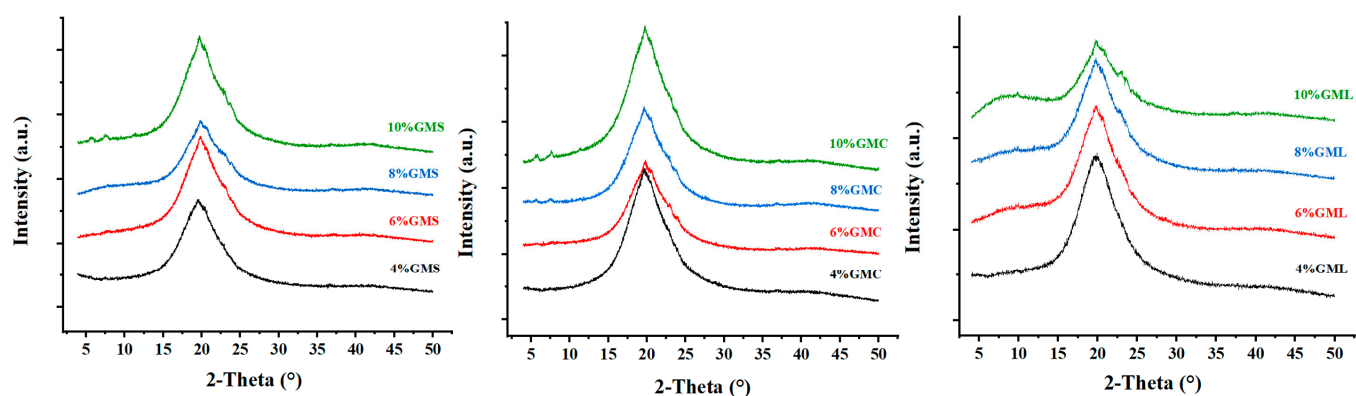

Figure S4. The X-ray Diffraction Patterns of the oleogels.

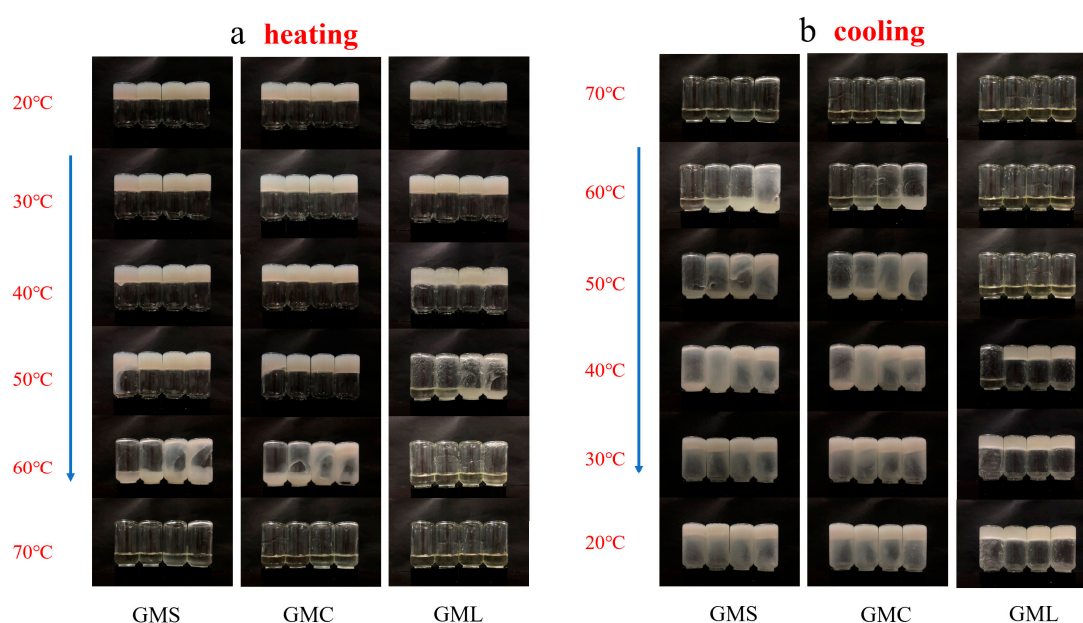

Figure S5. Visual appearance of oleogels during heating (a) and cooling process (b). The concentration of MAG from left to right is 4 wt%, 6 wt%, 8 wt%, 10 wt%.

Table S1. DSC melting parameters, onset temperature ( $T_{on}$ ), peak temperature ( $T_p$ ), end temperature ( $T_{end}$ ) and change in total enthalpy ( $\Delta H$ ) for oleogels.

| Sample | $T_{on}$ (°C)            | $T_p$ (°C)               | $T_{end}$ (°C)           | $\Delta H$ (W/g)       |
|--------|--------------------------|--------------------------|--------------------------|------------------------|
| 4%GMS  | 40.85±0.15 <sup>a</sup>  | 46.95±2.25 <sup>a</sup>  | 52.50±2.10 <sup>a</sup>  | 3.04±0.06 <sup>a</sup> |
| 6%GMS  | 42.40±0.10 <sup>b</sup>  | 49.10±0.30 <sup>ab</sup> | 53.70±0.50 <sup>ab</sup> | 5.26±0.04 <sup>b</sup> |
| 8%GMS  | 45.30±0.00 <sup>c</sup>  | 53.40±1.00 <sup>b</sup>  | 58.35±1.25 <sup>b</sup>  | 7.39±0.08 <sup>c</sup> |
| 10%GMS | 46.05±0.15 <sup>d</sup>  | 54.00±0.20 <sup>b</sup>  | 58.00±0.10 <sup>b</sup>  | 9.04±0.08 <sup>d</sup> |
| 4%GMC  | 43.25±0.55 <sup>a</sup>  | 49.25±3.45 <sup>a</sup>  | 54.05±1.25 <sup>a</sup>  | 2.93±0.02 <sup>a</sup> |
| 6%GMC  | 43.70±0.30 <sup>a</sup>  | 50.05±0.05 <sup>a</sup>  | 54.50±0.10 <sup>a</sup>  | 5.18±0.08 <sup>b</sup> |
| 8%GMC  | 46.10±0.60 <sup>b</sup>  | 53.45±0.55 <sup>a</sup>  | 57.80±0.80 <sup>b</sup>  | 7.54±0.04 <sup>c</sup> |
| 10%GMC | 46.30±0.10 <sup>b</sup>  | 54.10±0.10 <sup>a</sup>  | 58.40±0.40 <sup>b</sup>  | 9.06±0.04 <sup>d</sup> |
| 4%GML  | 34.65±0.25 <sup>a</sup>  | 41.30±0.50 <sup>a</sup>  | 46.25±0.25 <sup>a</sup>  | 2.16±0.08 <sup>a</sup> |
| 6%GML  | 36.70±0.70 <sup>ab</sup> | 44.35±0.15 <sup>b</sup>  | 47.70±0.10 <sup>b</sup>  | 3.85±0.24 <sup>b</sup> |
| 8%GML  | 38.35±0.95 <sup>bc</sup> | 45.00±0.30 <sup>bc</sup> | 47.95±0.05 <sup>b</sup>  | 5.05±0.23 <sup>c</sup> |
| 10%GML | 40.50±0.20 <sup>c</sup>  | 46.10±0.20 <sup>c</sup>  | 48.55±0.55 <sup>b</sup>  | 6.43±0.16 <sup>d</sup> |

Different lower-case letters (a, b, c, d) mean significant differences ( $p < 0.05$ ) between different concentration (the same MAG).
